# Supplementary material for: Simple and reliable detection of CRISPR-induced on-target effects by qgPCR and SNP genotyping
Source: Springer Nature journal article supplement (doi:10.1038/s41596-020-00481-2), 2021-02-17
Supplement: MOESM1 [file 41596_2020_481_MOESM1_ESM10.xlsx]

## Sheet: Sheet1
Supplementary Table 1: Primer, sgRNA and ssODN sequences
Primers/probes for PCR optimization and qgPCR assays (Fig. 1b, 3a, b, d, e)
Purpose	Name	Sequence 5'-3'
PCR optimization, qgPCR 1	fw1	ATCCTATAGGCAAGCATTGTATTTTTA
PCR optimization, qgPCR 1	rv1	GGGTAGGCTTTGTCTTACAGTGTTAT
qgPCR 1	probe1	56-FAM/CCGTCTTGA/ZEN/TATTTGTCAACCCAGAACCT/3IABkFQ
PCR optimization, qgPCR 2	fw2	CGCTCAGCCTAGCCTATTTATT
PCR optimization, qgPCR 2	rv2	TTGGGTAGGCTTTGTCTTACAG
qgPCR 2	probe2	56-FAM/TCCTGAGTC/ZEN/ATGTCGGAATTCTGCA/3IABkFQ
PCR optimization	fw3	ATTACAGGCTTGAGCCACTG
PCR optimization	rv3	GGGTATCATTTTTCTTTAAGAGTCA
Primers for nearby SNP genotyping (Fig. 1f, 3f)
Locus	Name	Sequence 5'-3'
APPSwe_-9kb	rs2829973_fw+Sanger	GCGGGCATTTTTCACTCTAA
APPSwe_-9kb	rs2829973_rv	ACCTGAACACAGGGAGTTGC
APPSwe_-2kb	rs9976425_fw	TGCTATTGCACATGTAACAGACT
APPSwe_-2kb	rs9976425_rv	GGGTAGGCTTTGTCTTACAGTGTTAT
APPSwe_-2kb	rs9976425_Sanger	CAAGGTCAGGAGGTCGAGAG
APPSwe_+10kb	rs1783016_fw+Sanger	TTGAATCAAATCCTTTGCTGT
APPSwe_+10kb	rs1783016_rv	CAAAATGTGAAGCTGCCTTCT
APPSwe_+157kb	rs9982732_fw+Sanger	TGCCATTATACCCCCACAAT
APPSwe_+157kb	rs9982732_rv	CAAAATGGCATCCAAAACCT
APPSwe_+501kb	rs222151_fw+Sanger	CCAAATATCCAGGTGCCTTC
APPSwe_+501kb	rs222151_rv	AGCAATGCAAGAGCAGCCTA
APPSwe_+1047kb	rs9984329_fw+Sanger	AATGCCAAACGCAGAAAACT
APPSwe_+1047kb	rs9984329_rv	GTGGGAGAACTTCCCAGAGA
Gene editing components (Fig. 3a)
Purpose	Strand	Sequence 5'-3' (*bold = cut site, blue = intended mutation, underlined = NGG)
APPSwe sgRNA	-	GGAGATCTCTGAAGTGAAGATGG
APPSwe ssODN for HDR-mediated repair	-	CAGGTTCTGGGTTGACAAATATCAAGACGGAGGAGATCTCTGAAGTGAATCTGGATGCAGAATTCCGACATGACTCAGGATATGAAGTTCATCATCAAAA
